# Supplementary material for: Remote physiological monitoring provides unique insights on the cardiovascular performance and stress responses of freely swimming rainbow trout in aquaculture
Source: PubMed Central journal article supplement (PMC6591390; doi:10.1038/s41598-019-45657-3), 2019-06-24
Supplement: 41598_2019_45657_MOESM1_ESM.pdf [file 41598_2019_45657_MOESM1_ESM.pdf]

**Remote physiological monitoring provides unique insights on the cardiovascular performance and stress responses of freely swimming rainbow trout in aquaculture**

**SUPPORTING DATA FOR MANUSCRIPT**

Jeroen Brijs<sup>1</sup>, Erik Sandblom<sup>2</sup>, Michael Axelsson<sup>2</sup>, Kristina Sundell<sup>2</sup>, Henrik Sundh<sup>2</sup>, Anders Kiessling<sup>3</sup>, Charlotte Berg<sup>1</sup> and Albin Gräns<sup>1\*</sup>

<sup>1</sup>Department of Animal Environment and Health, Swedish University of Agricultural Sciences, Skara, SE-532 31, Sweden

<sup>2</sup>Department of Biological and Environmental Sciences, University of Gothenburg, Gothenburg, SE-405-30, Sweden

<sup>3</sup>Department of Animal Nutrition and Management, Swedish University of Agricultural Sciences, Uppsala, SE-750 07, Sweden

**Cardiovascular responses of rainbow trout during a series of common aquaculture practices following the surgical implantation of bio-loggers (Fig. 2 and Table 1)**

**RELATIVE GASTROINTESTINAL BLOOD FLOW (%)**

| <b><u>Events</u></b>     | <b><u>Individual 1</u></b> | <b><u>Individual 2</u></b> | <b><u>Individual 3</u></b> | <b><u>Individual 4</u></b> |
|--------------------------|----------------------------|----------------------------|----------------------------|----------------------------|
| Before transportation    | 81.32436627                | 66.47082658                | 40.893961                  | 62.22062                   |
| Transportation initiated | 9.984480083                | 5.875202593                | 13.1716595                 | 12.6892574                 |
| End of transportation    | 87.32540093                | 73.90599676                | 85.4493581                 | 68.2768565                 |
| Before transfer          | 89.39472323                | 90.29578606                | 89.3961008                 | 83.741889                  |
| Transfer initiated       | 57.4754268                 | 73.27795786                | 68.8540181                 | 56.0562365                 |
| End of transfer          | 85.30781169                | 94.36790924                | 95.2924394                 | 77.4333093                 |
| Before feeding           | 92.55043973                | 93.39546191                | 85.3542558                 | 96.0346071                 |
| Directly after feeding   | 51.83652354                | 75.34440843                | 59.8668569                 | 72.2782985                 |
| End of day               | 79.4619762                 | 89.10048622                | 81.4550642                 | 88.0677722                 |

**HEART RATE (BEATS MIN<sup>-1</sup>)**

| <b><u>Events</u></b>     | <b><u>Individual 1</u></b> | <b><u>Individual 2</u></b> | <b><u>Individual 3</u></b> | <b><u>Individual 4</u></b> |
|--------------------------|----------------------------|----------------------------|----------------------------|----------------------------|
| Before transportation    | 64.4377                    | 70.4118                    | 67.3917                    | 78.0745                    |
| Transportation initiated | 50.2701                    | 57.8675                    | 55.3175                    | 69.7521                    |
| End of transportation    | 70.0227                    | 94.4182                    | 78.4135                    | 84.9477                    |
| Before transfer          | 66.5993                    | 91.0444                    | 77.3602                    | 80.9862                    |
| Transfer initiated       | 74.2085                    | 89.7031                    | 80.6059                    | 82.9243                    |
| End of transfer          | 64.952                     | 85.0783                    | 79.4136                    | 83.7638                    |
| Before feeding           | 67.4404                    | 90.0645                    | 78.2845                    | 84.0226                    |
| Directly after feeding   | 72.4241                    | 85.3813                    | 78.1508                    | 79.1498                    |
| End of day               | 59.9359                    | 86.0962                    | 78.9278                    | 82.5036                    |

**Long-term cardiovascular responses of freely swimming rainbow trout in the sea cage  
(Fig. 3)**

| <b><u>INDIVIDUAL 1</u></b> |                                |                                                   |                                |
|----------------------------|--------------------------------|---------------------------------------------------|--------------------------------|
| <b><u>Day</u></b>          | <b><u>Relative GBF (%)</u></b> | <b><u>Heart Rate (beats min<sup>-1</sup>)</u></b> | <b><u>Temperature (°C)</u></b> |
| 1                          | 97.61683049                    | 62.76159333                                       | 16.148                         |
| 2                          | 84.54906018                    | 59.41358                                          | 16.21466667                    |
| 3                          | 77.63062597                    | 54.95409333                                       | 16.14                          |
| 4                          | 66.22176237                    | 58.36408667                                       | 16.35866667                    |
| 5                          | 64.80082773                    | 51.24646                                          | 16.416                         |
| 6                          | 67.05294016                    | 50.51934667                                       | 16.30133333                    |
| 7                          | 54.5645801                     | 48.35616667                                       | 16.37266667                    |
| 8                          | 58.82393516                    | 46.99187333                                       | 15.998                         |
| 9                          | 53.52647008                    | 45.97104                                          | 15.77333333                    |
| 10                         | 50.57768581                    | 46.2217                                           | 15.64266667                    |
| 11                         | 58.15830316                    | 46.06086                                          | 15.624                         |
| 12                         | 58.31350233                    | 48.4722                                           | 15.46733333                    |

| <b><u>INDIVIDUAL 2</u></b> |                                |                                                   |                                |
|----------------------------|--------------------------------|---------------------------------------------------|--------------------------------|
| <b><u>Day</u></b>          | <b><u>Relative GBF (%)</u></b> | <b><u>Heart Rate (beats min<sup>-1</sup>)</u></b> | <b><u>Temperature (°C)</u></b> |
| 1                          | 82.26634252                    | 85.27316667                                       | 16.308                         |
| 2                          | 77.61885467                    | 81.51934                                          | 16.33666667                    |
| 3                          | 71.98541329                    | 77.46222667                                       | 16.24333333                    |
| 4                          | 62.45137763                    | 75.30125333                                       | 16.41533333                    |
| 5                          | 65.77120475                    | 73.2249                                           | 16.46333333                    |
| 6                          | 60.71447866                    | 71.78089333                                       | 16.38933333                    |
| 7                          | 64.69611021                    | 69.49721333                                       | 16.4                           |
| 8                          | 59.43679092                    | 66.09208                                          | 15.984                         |
| 9                          | 55.60237709                    | 65.11649333                                       | 15.768                         |
| 10                         | 54.26796326                    | 60.68089333                                       | 15.656                         |
| 11                         | 52.21907077                    | 59.35549333                                       | 15.59466667                    |
| 12                         | 53.54132901                    | 56.28865333                                       | 15.562                         |

**Relationship between mean heart rate and subsequent heart rate response of rainbow trout during activity (Fig. 5)**

| <u>INDIVIDUAL 1</u>                                          |                                                                         | <u>INDIVIDUAL 2</u>                                          |                                                                         |
|--------------------------------------------------------------|-------------------------------------------------------------------------|--------------------------------------------------------------|-------------------------------------------------------------------------|
| Mean heart rate prior to activity (beats min <sup>-1</sup> ) | Change in heart rate in response to activity (beats min <sup>-1</sup> ) | Mean heart rate prior to activity (beats min <sup>-1</sup> ) | Change in heart rate in response to activity (beats min <sup>-1</sup> ) |
| 78                                                           | -7                                                                      | 76                                                           | -21                                                                     |
| 75                                                           | -5                                                                      | 79                                                           | -18                                                                     |
| 71                                                           | -4                                                                      | 78                                                           | -15                                                                     |
| 65                                                           | 0                                                                       | 81                                                           | -23                                                                     |
| 66                                                           | -4                                                                      | 83                                                           | -17                                                                     |
| 76                                                           | -4                                                                      | 82                                                           | -17                                                                     |
| 67                                                           | 5                                                                       | 83                                                           | -18                                                                     |
| 65                                                           | 4                                                                       | 99                                                           | -17                                                                     |
| 66                                                           | 7                                                                       | 95                                                           | -20                                                                     |
| 63                                                           | 10                                                                      | 95                                                           | -29                                                                     |
| 66                                                           | 4                                                                       | 82                                                           | -22                                                                     |
| 61                                                           | 4                                                                       | 86                                                           | -21                                                                     |
| 58                                                           | 7                                                                       | 79                                                           | -14                                                                     |
| 62                                                           | 8                                                                       | 82                                                           | -15                                                                     |
| 62                                                           | 9                                                                       | 83                                                           | -18                                                                     |
| 63                                                           | 13                                                                      | 90                                                           | -22                                                                     |
| 61                                                           | 7                                                                       | 98                                                           | -13                                                                     |
| 59                                                           | 15                                                                      | 99                                                           | -20                                                                     |
| 59                                                           | 7                                                                       | 86                                                           | -21                                                                     |
| 61                                                           | 9                                                                       | 94                                                           | -20                                                                     |
| 60                                                           | 13                                                                      | 88                                                           | -17                                                                     |
| 57                                                           | 9                                                                       | 75                                                           | -18                                                                     |
| 53                                                           | 17                                                                      | 87                                                           | -11                                                                     |
| 61                                                           | 10                                                                      | 89                                                           | -21                                                                     |
| 56                                                           | 15                                                                      | 89                                                           | -26                                                                     |
| 58                                                           | 10                                                                      | 89                                                           | -24                                                                     |
| 56                                                           | 14                                                                      | 90                                                           | -20                                                                     |
| 59                                                           | 11                                                                      | 90                                                           | -16                                                                     |
| 55                                                           | 16                                                                      | 91                                                           | -14                                                                     |
| 58                                                           | 9                                                                       | 92                                                           | -33                                                                     |
| 54                                                           | 15                                                                      | 94                                                           | -18                                                                     |
| 54                                                           | 16                                                                      | 90                                                           | -21                                                                     |
| 57                                                           | 15                                                                      | 91                                                           | -16                                                                     |
| 58                                                           | 13                                                                      | 94                                                           | -21                                                                     |
| 55                                                           | 8                                                                       | 88                                                           | -9                                                                      |
| 52                                                           | 12                                                                      | 90                                                           | -13                                                                     |
| 53                                                           | 13                                                                      | 87                                                           | -11                                                                     |
| 53                                                           | 20                                                                      | 87                                                           | -9                                                                      |
| 53                                                           | 21                                                                      | 82                                                           | -12                                                                     |
| 54                                                           | 11                                                                      | 78                                                           | -10                                                                     |
| 55                                                           | 9                                                                       | 82                                                           | -7                                                                      |
| 57                                                           | 15                                                                      | 84                                                           | -14                                                                     |
| 53                                                           | 12                                                                      | 80                                                           | -7                                                                      |
| 51                                                           | 8                                                                       | 77                                                           | -4                                                                      |
| 52                                                           | 10                                                                      | 77                                                           | -9                                                                      |
| 53                                                           | 12                                                                      | 74                                                           | -7                                                                      |
| 49                                                           | 15                                                                      | 69                                                           | 2                                                                       |
| 54                                                           | 12                                                                      | 73                                                           | 2                                                                       |
| 52                                                           | 22                                                                      | 70                                                           | 3                                                                       |
| 57                                                           | 8                                                                       | 74                                                           | -3                                                                      |
| 52                                                           | 21                                                                      | 70                                                           | -5                                                                      |
| 54                                                           | 21                                                                      | 70                                                           | 3                                                                       |
| 54                                                           | 17                                                                      | 69                                                           | 0                                                                       |
| 50                                                           | 17                                                                      | 70                                                           | 4                                                                       |
| 52                                                           | 18                                                                      | 71                                                           | 3                                                                       |
| 49                                                           | 16                                                                      | 73                                                           | 0                                                                       |
| 54                                                           | 13                                                                      | 69                                                           | 10                                                                      |
| 51                                                           | 15                                                                      | 70                                                           | 1                                                                       |
| 46                                                           | 23                                                                      | 68                                                           | 10                                                                      |
| 49                                                           | 17                                                                      | 72                                                           | -2                                                                      |
| 45                                                           | 20                                                                      | 67                                                           | 3                                                                       |
| 46                                                           | 20                                                                      | 62                                                           | 14                                                                      |
| 50                                                           | 11                                                                      | 66                                                           | 7                                                                       |
| 49                                                           | 17                                                                      | 68                                                           | 13                                                                      |
| 48                                                           | 15                                                                      | 59                                                           | 13                                                                      |
| 45                                                           | 18                                                                      | 63                                                           | 11                                                                      |
| 44                                                           | 26                                                                      | 65                                                           | 9                                                                       |
| 47                                                           | 25                                                                      | 67                                                           | 15                                                                      |
| 49                                                           | 16                                                                      | 70                                                           | -8                                                                      |
| 49                                                           | 16                                                                      | 65                                                           | 13                                                                      |
| 45                                                           | 25                                                                      | 64                                                           | 16                                                                      |
| 48                                                           | 10                                                                      | 64                                                           | 15                                                                      |
| 42                                                           | 23                                                                      | 63                                                           | 9                                                                       |
| 57                                                           | 11                                                                      | 68                                                           | 9                                                                       |
| 50                                                           | 14                                                                      | 66                                                           | 14                                                                      |
| 48                                                           | 20                                                                      | 68                                                           | 7                                                                       |
| 50                                                           | 18                                                                      | 66                                                           | 4                                                                       |
| 43                                                           | 23                                                                      | 62                                                           | 18                                                                      |
| 47                                                           | 16                                                                      | 66                                                           | 5                                                                       |
| 42                                                           | 25                                                                      | 63                                                           | 12                                                                      |
| 44                                                           | 17                                                                      | 56                                                           | 17                                                                      |

|    |    |    |    |
|----|----|----|----|
| 48 | 18 | 65 | 8  |
| 50 | 13 | 62 | 14 |
| 56 | 11 | 67 | 7  |
|    |    | 61 | 17 |

**Relationship between mean heart rate and subsequent heart rate response of rainbow trout during activity (Fig. 5)... CONTINUED**

**INDIVIDUAL 2 (continued)**

| Mean heart rate prior to activity (beats min <sup>-1</sup> ) | Change in heart rate in response to activity (beats min <sup>-1</sup> ) |
|--------------------------------------------------------------|-------------------------------------------------------------------------|
| 59                                                           | 9                                                                       |
| 58                                                           | 17                                                                      |
| 54                                                           | 18                                                                      |
| 58                                                           | 12                                                                      |
| 58                                                           | 14                                                                      |
| 58                                                           | 19                                                                      |
| 56                                                           | 11                                                                      |
| 60                                                           | 10                                                                      |
| 58                                                           | 8                                                                       |
| 54                                                           | 19                                                                      |
| 54                                                           | 13                                                                      |
| 52                                                           | 15                                                                      |
| 55                                                           | 13                                                                      |
| 56                                                           | 10                                                                      |
| 53                                                           | 21                                                                      |
| 52                                                           | 16                                                                      |
| 55                                                           | 13                                                                      |
| 53                                                           | 15                                                                      |
| 49                                                           | 19                                                                      |
| 49                                                           | 21                                                                      |
| 51                                                           | 16                                                                      |
| 52                                                           | 15                                                                      |
| 54                                                           | 9                                                                       |
| 44                                                           | 22                                                                      |

**Cardiovascular responses of an individual rainbow trout during the last days in in the sea cage with conspecifics, including a series of common aquaculture practices associated with transporting trout to the slaughterhouse (Fig. 6)**

**INDIVIDUAL 1**

| <u>Day</u> | <u>Relative GBF (%)</u> | <u>Heart rate (beats min<sup>-1</sup>)</u> | <u>Temperature (°C)</u> |
|------------|-------------------------|--------------------------------------------|-------------------------|
| 12         | 58.3135023              | 48.4722                                    | 15.4673333              |
| 13         | 58.482497               | 45.3549333                                 | 15.3466667              |
| 14         | 50.9122262              | 44.7103533                                 | 15.1206667              |
| 15         | 53.9989653              | 49.3235733                                 | 14.7486667              |
| 16         | 54.6266598              | 45.2349733                                 | 14.5306667              |

**INDIVIDUAL 1**

| <u>Day</u> | <u>Relative GBF (%)</u> | <u>Heart rate (beats min<sup>-1</sup>)</u> | <u>Temperature (°C)</u> |
|------------|-------------------------|--------------------------------------------|-------------------------|
| 0.29166667 | 55.9234351              | 66.1604                                    | 14.22                   |
| 0.29305556 | 55.6647698              | 65.662                                     | 14.43                   |
| 0.29444444 | 55.5613037              | 65.1636                                    | 14.45                   |
| 0.29583333 | 55.4061045              | 67.7833                                    | 14.49                   |
| 0.29722222 | 53.5437144              | 72.2943                                    | 14.5                    |
| 0.29861111 | 53.4919814              | 72.1326                                    | 14.5                    |
| 0.3        | 52.0951888              | 72.6375                                    | 14.5                    |
| 0.30138889 | 48.0600103              | 75.6298                                    | 14.5                    |
| 0.30277778 | 55.7682359              | 73.4244                                    | 14.52                   |
| 0.30416667 | 61.0967408              | 72.2399                                    | 14.5                    |
| 0.30555556 | 63.3212623              | 70.999                                     | 14.5                    |
| 0.30694444 | 62.2348681              | 71.3806                                    | 14.5                    |
| 0.30833333 | 62.2348681              | 69.9109                                    | 14.5                    |
| 0.30972222 | 60.5794102              | 68.1467                                    | 14.5                    |
| 0.31111111 | 61.7692706              | 66.7158                                    | 14.5                    |
| 0.3125     | 66.0631143              | 65.1527                                    | 14.5                    |
| 0.31388889 | 60.2690119              | 66.1373                                    | 14.5                    |
| 0.31527778 | 67.5116399              | 62.167                                     | 14.5                    |
| 0.31666667 | 74.5990688              | 62.4325                                    | 14.5                    |
| 0.31805556 | 74.6508019              | 64.635                                     | 14.5                    |
| 0.31944444 | 68.6497672              | 65.2478                                    | 14.5                    |
| 0.32083333 | 47.6978789              | 66.9677                                    | 14.49                   |
| 0.32222222 | 45.00776                | 67.3051                                    | 14.46                   |
| 0.32361111 | 41.1277807              | 68.8131                                    | 14.45                   |
| 0.325      | 44.3869633              | 67.6484                                    | 14.45                   |
| 0.32638889 | 51.0087946              | 65.1282                                    | 14.44                   |
| 0.32777778 | 54.4749095              | 67.0727                                    | 14.45                   |
| 0.32916667 | 39.5757889              | 69.5473                                    | 14.44                   |
| 0.33055556 | 57.2167615              | 66.4209                                    | 14.44                   |
| 0.33194444 | 71.2881531              | 62.3489                                    | 14.44                   |
| 0.33333333 | 77.2891878              | 63.6846                                    | 14.46                   |
| 0.33472222 | 83.3936886              | 62.6605                                    | 14.48                   |
| 0.33611111 | 86.7046042              | 62.7247                                    | 14.45                   |
| 0.3375     | 85.61821                | 62.7737                                    | 14.47                   |
| 0.33888889 | 84.3766167              | 62.085                                     | 14.45                   |
| 0.34027778 | 74.9094671              | 61.509                                     | 14.45                   |
| 0.34166667 | 79.1515779              | 58.6958                                    | 14.47                   |
| 0.34305556 | 75.685463               | 61.7155                                    | 14.48                   |
| 0.34444444 | 72.3228143              | 62.0593                                    | 14.45                   |
| 0.34583333 | 74.2886705              | 59.4086                                    | 14.46                   |
| 0.34722222 | 77.0822556              | 59.9423                                    | 14.45                   |
| 0.34861111 | 78.9446456              | 61.7105                                    | 14.44                   |
| 0.35       | 83.2384894              | 66.1788                                    | 14.45                   |
| 0.35138889 | 82.7728919              | 68.3865                                    | 14.44                   |
| 0.35277778 | 84.5835489              | 67.0659                                    | 14.42                   |
| 0.35416667 | 79.6689084              | 68.7614                                    | 14.45                   |
| 0.35555556 | 72.8401449              | 68.0149                                    | 14.44                   |
| 0.35694444 | 42.6797724              | 83.0696                                    | 14.44                   |
| 0.35833333 | 19.7620279              | 82.5533                                    | 14.44                   |
| 0.35972222 | 12.2090016              | 81.2478                                    | 14.45                   |
| 0.36111111 | 12.7780652              | 75.6401                                    | 14.49                   |
| 0.3625     | 16.9167098              | 63.5619                                    | 14.5                    |
| 0.36388889 | 28.2462494              | 63.7147                                    | 14.5                    |
| 0.36527778 | 36.9891361              | 66.9229                                    | 14.5                    |
| 0.36666667 | 41.0760476              | 70.0547                                    | 14.5                    |
| 0.36805556 | 27.884118               | 68.4879                                    | 14.53                   |
| 0.36944444 | 26.4355923              | 59.2585                                    | 14.56                   |
| 0.37083333 | 30.4707708              | 52.7108                                    | 14.6                    |
| 0.37222222 | 39.1619245              | 60.4606                                    | 14.62                   |
| 0.37361111 | 38.9549922              | 62.5533                                    | 14.62                   |
| 0.375      | 41.2829798              | 62.5102                                    | 14.62                   |
| 0.37638889 | 39.9896534              | 60.2473                                    | 14.62                   |
| 0.37777778 | 39.7309881              | 58.6496                                    | 14.62                   |

|            |            |         |       |
|------------|------------|---------|-------|
| 0.37916667 | 37.7133989 | 62.7212 | 14.62 |
| 0.38055556 | 35.5406105 | 61.1472 | 14.62 |
| 0.38194444 | 33.1608898 | 49.7331 | 14.62 |

**Cardiovascular responses of an individual rainbow trout during the last days in in the sea cage with conspecifics, including a series of common aquaculture practices associated with transporting trout to the slaughterhouse (Fig. 6)...CONTINUED**

| <b>INDIVIDUAL 1 (CONTINUED)</b> |                         |                                            |                         |
|---------------------------------|-------------------------|--------------------------------------------|-------------------------|
| <u>Day</u>                      | <u>Relative GBF (%)</u> | <u>Heart rate (beats min<sup>-1</sup>)</u> | <u>Temperature (°C)</u> |
| 0.38472222                      | 33.9886187              | 57.4889                                    | 14.63                   |
| 0.38611111                      | 35.6440766              | 61.7077                                    | 14.64                   |
| 0.3875                          | 35.0232799              | 54.8854                                    | 14.67                   |
| 0.38888889                      | 37.1443352              | 57.7693                                    | 14.69                   |
| 0.39027778                      | 37.6616658              | 63.9614                                    | 14.7                    |
| 0.39166667                      | 34.5576824              | 58.4483                                    | 14.69                   |
| 0.39305556                      | 33.2643559              | 64.0547                                    | 14.69                   |
| 0.39444444                      | 34.4542162              | 65.1271                                    | 14.71                   |
| 0.39583333                      | 32.6952923              | 66.4849                                    | 14.75                   |
| 0.39722222                      | 32.1262287              | 71.2313                                    | 14.75                   |
| 0.39861111                      | 31.7123642              | 69.9046                                    | 14.78                   |
| 0.4                             | 30.7811692              | 71.8985                                    | 14.81                   |
| 0.40138889                      | 33.5747543              | 63.9482                                    | 14.81                   |
| 0.40277778                      | 36.937403               | 58.251                                     | 14.83                   |
| 0.40416667                      | 34.7128815              | 64.2183                                    | 14.87                   |
| 0.40555556                      | 33.316089               | 68.3801                                    | 14.88                   |
| 0.40694444                      | 34.5059493              | 69.1914                                    | 14.88                   |
| 0.40833333                      | 34.5576824              | 67.9747                                    | 14.88                   |
| 0.40972222                      | 35.2302121              | 65.1044                                    | 14.91                   |
| 0.41111111                      | 35.0750129              | 71.3925                                    | 14.94                   |
| 0.4125                          | 31.0915675              | 75.0527                                    | 14.94                   |
| 0.41388889                      | 30.8329022              | 72.5465                                    | 14.85                   |
| 0.41527778                      | 31.8675634              | 70.0403                                    | 14.94                   |
| 0.41666667                      | 31.8675634              | 67.5341                                    | 14.94                   |
| 0.41805556                      | 31.0915675              | 68.3621                                    | 14.94                   |
| 0.41944444                      | 31.8675634              | 69.4011                                    | 14.94                   |
| 0.42083333                      | 32.6435592              | 66.5609                                    | 14.91                   |
| 0.42222222                      | 32.436627               | 68.5722                                    | 14.88                   |
| 0.42361111                      | 30.5742369              | 68.8599                                    | 14.88                   |
| 0.425                           | 27.7806518              | 72.675                                     | 14.88                   |
| 0.42638889                      | 26.9529229              | 65.9371                                    | 14.88                   |
| 0.42777778                      | 25.6078634              | 72.8137                                    | 14.87                   |
| 0.42916667                      | 27.7806518              | 64.0893                                    | 14.86                   |
| 0.43055556                      | 28.815313               | 68.5864                                    | 14.82                   |
| 0.43194444                      | 26.9529229              | 70.4441                                    | 14.81                   |
| 0.43333333                      | 25.7113295              | 74.4303                                    | 14.81                   |
| 0.43472222                      | 27.4702535              | 71.0784                                    | 14.81                   |
| 0.43611111                      | 25.9699948              | 66.3279                                    | 14.81                   |
| 0.4375                          | 28.3497155              | 69.0523                                    | 14.81                   |
| 0.43888889                      | 26.9011899              | 67.0255                                    | 14.81                   |
| 0.44027778                      | 27.004656               | 71.285                                     | 14.81                   |
| 0.44166667                      | 27.3667874              | 68.3604                                    | 14.81                   |
| 0.44305556                      | 27.1598551              | 74.7356                                    | 14.81                   |
| 0.44444444                      | 29.0739783              | 70.8267                                    | 14.81                   |
| 0.44583333                      | 24.36627                | 74.0057                                    | 14.81                   |
| 0.44722222                      | 28.2979824              | 76.1504                                    | 14.81                   |
| 0.44861111                      | 28.2979824              | 72.1708                                    | 14.81                   |
| 0.45                            | 26.4873254              | 77.3729                                    | 14.81                   |
| 0.45138889                      | 28.0910502              | 73.1305                                    | 14.81                   |
| 0.45277778                      | 27.1598551              | 74.9554                                    | 14.79                   |
| 0.45416667                      | 23.0729436              | 70.4887                                    | 14.81                   |
| 0.45555556                      | 17.6409726              | 71.9946                                    | 14.81                   |
| 0.45694444                      | 23.9006725              | 70.9917                                    | 14.82                   |
| 0.45833333                      | 26.7977237              | 66.959                                     | 14.84                   |
| 0.45972222                      | 28.9705122              | 69.8623                                    | 14.83                   |
| 0.46111111                      | 32.2296948              | 71.0392                                    | 14.83                   |
| 0.4625                          | 28.9705122              | 70.3097                                    | 14.84                   |
| 0.46388889                      | 31.4019659              | 69.8589                                    | 14.83                   |
| 0.46527778                      | 34.5576824              | 69.3804                                    | 14.81                   |
| 0.46666667                      | 33.0574237              | 67.4586                                    | 14.81                   |
| 0.46805556                      | 35.0232799              | 67.8023                                    | 14.81                   |
| 0.46944444                      | 37.0408691              | 71.3784                                    | 14.81                   |
| 0.47083333                      | 36.8856699              | 68.3497                                    | 14.81                   |
| 0.47222222                      | 41.6968443              | 67.4828                                    | 14.81                   |
| 0.47361111                      | 50.3362649              | 67.8791                                    | 14.81                   |
| 0.475                           | 49.9224004              | 70.6126                                    | 14.71                   |
| 0.47638889                      | 45.938955               | 69.9712                                    | 14.81                   |
| 0.47777778                      | 49.7672012              | 69.3298                                    | 14.81                   |
| 0.47916667                      | 51.9917227              | 68.6884                                    | 14.81                   |
| 0.48055556                      | 52.1469219              | 66.1897                                    | 14.81                   |
| 0.48194444                      | 48.5773409              | 67.083                                     | 14.81                   |
| 0.48333333                      | 60.1138127              | 70.9726                                    | 14.81                   |
| 0.48472222                      | 68.8049664              | 69.2164                                    | 14.8                    |
| 0.48611111                      | 69.5809622              | 71.3999                                    | 14.77                   |

|            |            |         |       |
|------------|------------|---------|-------|
| 0.4875     | 67.4081738 | 68.1262 | 14.76 |
| 0.48888889 | 66.4769788 | 70.8823 | 14.75 |
| 0.49027778 | 66.5804449 | 67.4697 | 14.75 |

**Cardiovascular responses of an individual rainbow trout during the last days in in the sea cage with conspecifics, including a series of common aquaculture practices associated with transporting trout to the slaughterhouse (Fig. 6)...CONTINUED**

**INDIVIDUAL 1 (CONTINUED)**

| <u>Day</u> | <u>Relative GBF (%)</u> | <u>Heart rate (beats min<sup>-1</sup>)</u> | <u>Temperature (°C)</u> |
|------------|-------------------------|--------------------------------------------|-------------------------|
| 0.49583333 | 70.3569581              | 67.7864                                    | 14.75                   |
| 0.49722222 | 72.5814796              | 67.4958                                    | 14.75                   |
| 0.49861111 | 75.5819969              | 68.3983                                    | 14.75                   |
| 0.5        | 74.5473357              | 69.0437                                    | 14.76                   |
| 0.50138889 | 70.4604242              | 67.188                                     | 14.77                   |
| 0.50277778 | 66.7356441              | 68.6666                                    | 14.77                   |
| 0.50416667 | 70.7708226              | 68.8347                                    | 14.77                   |
| 0.50555556 | 74.6508019              | 66.9893                                    | 14.77                   |
| 0.50694444 | 62.7004656              | 66.1068                                    | 14.79                   |
| 0.50833333 | 69.5292292              | 64.3386                                    | 14.81                   |
| 0.50972222 | 66.683911               | 66.4382                                    | 14.81                   |
| 0.51111111 | 67.2012416              | 66.8205                                    | 14.81                   |
| 0.5125     | 67.8220383              | 64.0171                                    | 14.81                   |
| 0.51388889 | 71.0812209              | 65.325                                     | 14.81                   |
| 0.51527778 | 58.9239524              | 63.2048                                    | 14.81                   |
| 0.51666667 | 72.5297465              | 65.1336                                    | 14.81                   |
| 0.51805556 | 75.5819969              | 65.0091                                    | 14.81                   |
| 0.51944444 | 76.1510605              | 63.5559                                    | 14.81                   |
| 0.52083333 | 78.8411795              | 67.1579                                    | 14.82                   |
| 0.52222222 | 81.996896               | 65.4587                                    | 14.84                   |
| 0.52361111 | 64.6145887              | 64.1757                                    | 14.84                   |
| 0.525      | 70.4604242              | 64.1596                                    | 14.83                   |
| 0.52638889 | 75.5819969              | 65.3071                                    | 14.85                   |
| 0.52777778 | 78.0651837              | 64.9773                                    | 14.87                   |
| 0.52916667 | 64.873254               | 60.2634                                    | 14.87                   |
| 0.53055556 | 68.7532333              | 62.2708                                    | 14.87                   |
| 0.53194444 | 76.6683911              | 64.8026                                    | 14.88                   |
| 0.53333333 | 77.444387               | 63.453                                     | 14.88                   |
| 0.53472222 | 80.4966374              | 64.7938                                    | 14.88                   |
| 0.53611111 | 81.5312985              | 64.4595                                    | 14.75                   |
| 0.5375     | 82.1003621              | 63.2645                                    | 14.88                   |
| 0.53888889 | 62.3900673              | 59.1494                                    | 14.88                   |
| 0.54027778 | 68.7015003              | 66.1075                                    | 14.89                   |
| 0.54166667 | 77.8065184              | 66.0238                                    | 14.88                   |
| 0.54305556 | 80.7553026              | 65.9401                                    | 14.88                   |
| 0.54444444 | 81.6347646              | 65.8564                                    | 14.91                   |
| 0.54583333 | 89.9120538              | 69.524                                     | 14.92                   |
| 0.54722222 | 92.757372               | 67.1803                                    | 14.93                   |
| 0.54861111 | 90.1707191              | 65.9831                                    | 14.94                   |
| 0.55       | 87.8944646              | 64.553                                     | 14.94                   |
| 0.55138889 | 89.4464563              | 65.6088                                    | 14.94                   |
| 0.55277778 | 90.118986               | 66.1129                                    | 14.94                   |
| 0.55416667 | 93.688567               | 64.6487                                    | 14.94                   |
| 0.55555556 | 94.4645629              | 67.5922                                    | 14.94                   |
| 0.55694444 | 94.9301604              | 62.7159                                    | 14.94                   |
| 0.55833333 | 94.568029               | 65.1429                                    | 14.94                   |
| 0.55972222 | 80.7553026              | 63.414                                     | 14.94                   |
| 0.56111111 | 91.7227108              | 62.4254                                    | 14.94                   |
| 0.5625     | 87.3254009              | 66.0894                                    | 14.94                   |
| 0.56388889 | 88.5669943              | 66.8677                                    | 14.94                   |
| 0.56527778 | 76.2545266              | 62.9634                                    | 14.94                   |
| 0.56666667 | 85.4630109              | 63.8275                                    | 14.94                   |
| 0.56805556 | 90.7915158              | 65.2542                                    | 14.94                   |
| 0.56944444 | 89.0843249              | 66.1436                                    | 14.94                   |
| 0.57083333 | 88.6187274              | 61.3541                                    | 14.95                   |
| 0.57222222 | 93.5333678              | 64.7006                                    | 14.95                   |
| 0.57361111 | 96.7408174              | 67.158                                     | 14.96                   |
| 0.575      | 96.7925504              | 63.8838                                    | 14.97                   |
| 0.57638889 | 76.7201242              | 63.3258                                    | 14.96                   |
| 0.57777778 | 88.6187274              | 65.2787                                    | 14.97                   |
| 0.57916667 | 98.5514744              | 64.9923                                    | 14.98                   |
| 0.58055556 | 97.8789446              | 65.4428                                    | 14.99                   |
| 0.58194444 | 98.8618727              | 65.0633                                    | 15                      |
| 0.58333333 | 98.6549405              | 64.9088                                    | 15                      |
| 0.58472222 | 98.6549405              | 64.9182                                    | 15                      |
| 0.58611111 | 96.5338852              | 61.1018                                    | 15                      |
| 0.5875     | 82.8246249              | 58.32                                      | 15                      |
| 0.58888889 | 73.1505432              | 58.5099                                    | 15                      |
| 0.59027778 | 78.9963787              | 60.1604                                    | 15                      |
| 0.59166667 | 82.1520952              | 60.3764                                    | 15                      |
| 0.59305556 | 91.5675116              | 61.7582                                    | 15                      |
| 0.59444444 | 77.3926539              | 59.2058                                    | 15                      |
| 0.59583333 | 71.5468184              | 58.4941                                    | 15                      |
| 0.59722222 | 82.3072944              | 58.1119                                    | 15                      |
| 0.59861111 | 82.6694258              | 62.8288                                    | 15                      |
| 0.6        | 83.0315572              | 64.9816                                    | 15                      |
| 0.60138889 | 83.3936886              | 65.2637                                    | 15                      |



0.6027778  
0.6041667

83.75582  
98.5514744

65.5458  
65.8279

15  
15
